# Supplementary material for: Diet Alters Serum Metabolomic Profiling in the Mouse Model of Chronic Chagas Cardiomyopathy
Source: Hindawi journal article supplement (doi:10.1155/2019/4956016), 2019-12-20

Supplemental Fig. 1

**a**

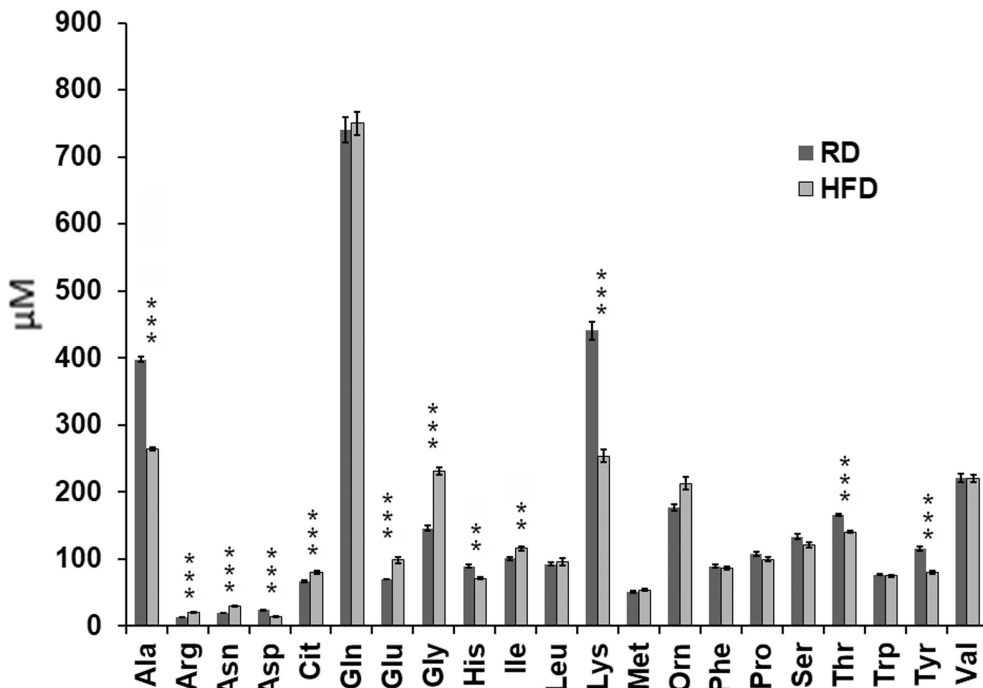

**b**

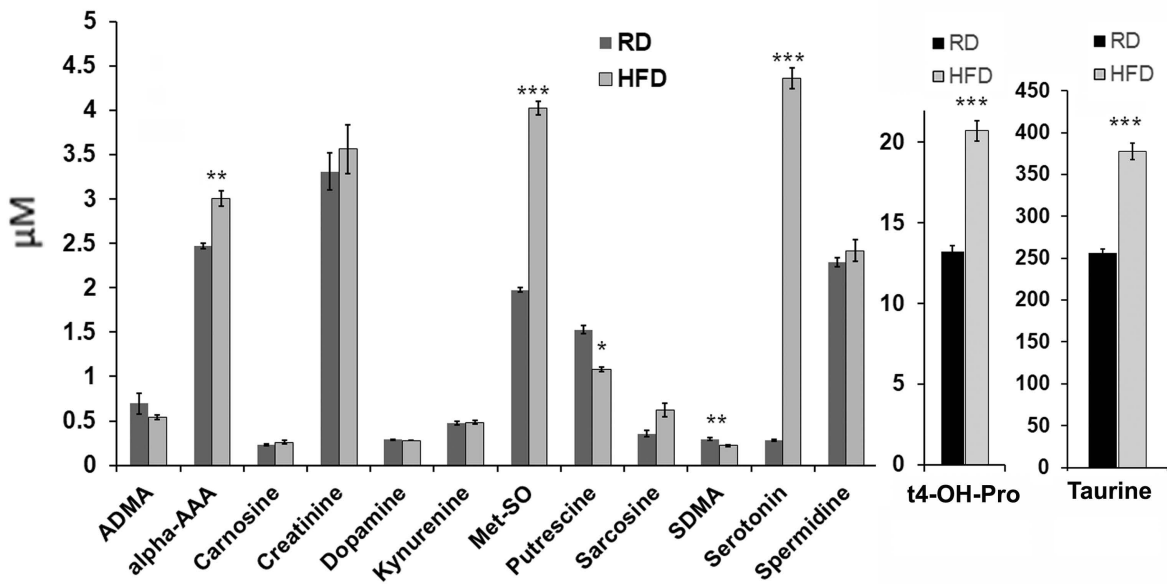

# Supplemental Fig. 3

a

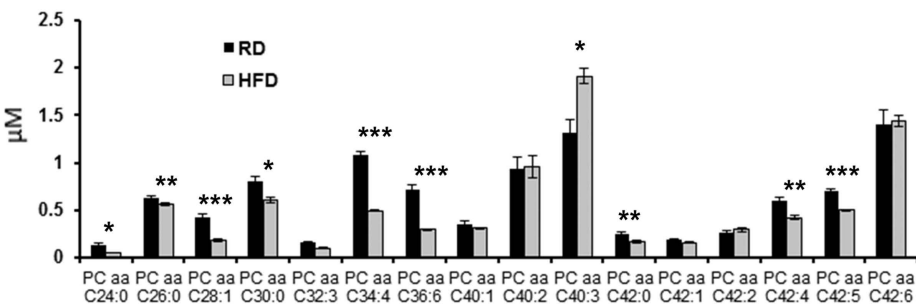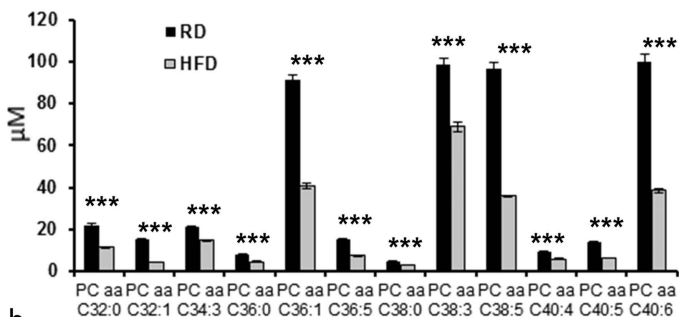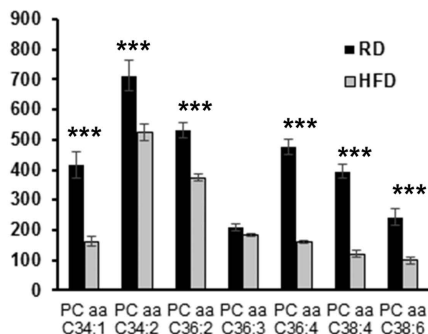

b

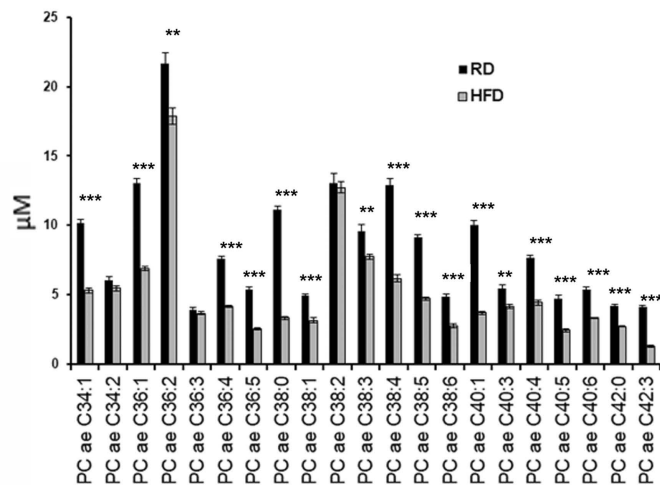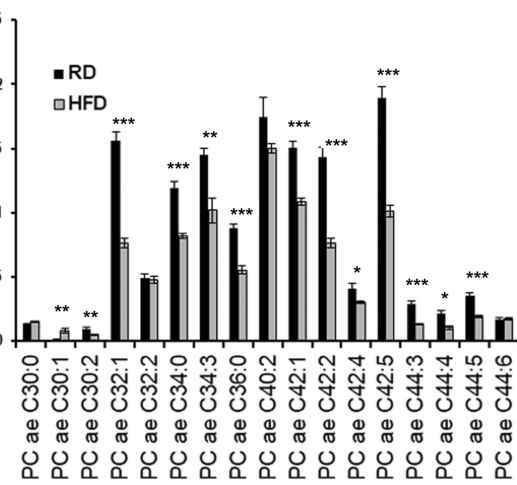

# Supplemental Fig. 2

a

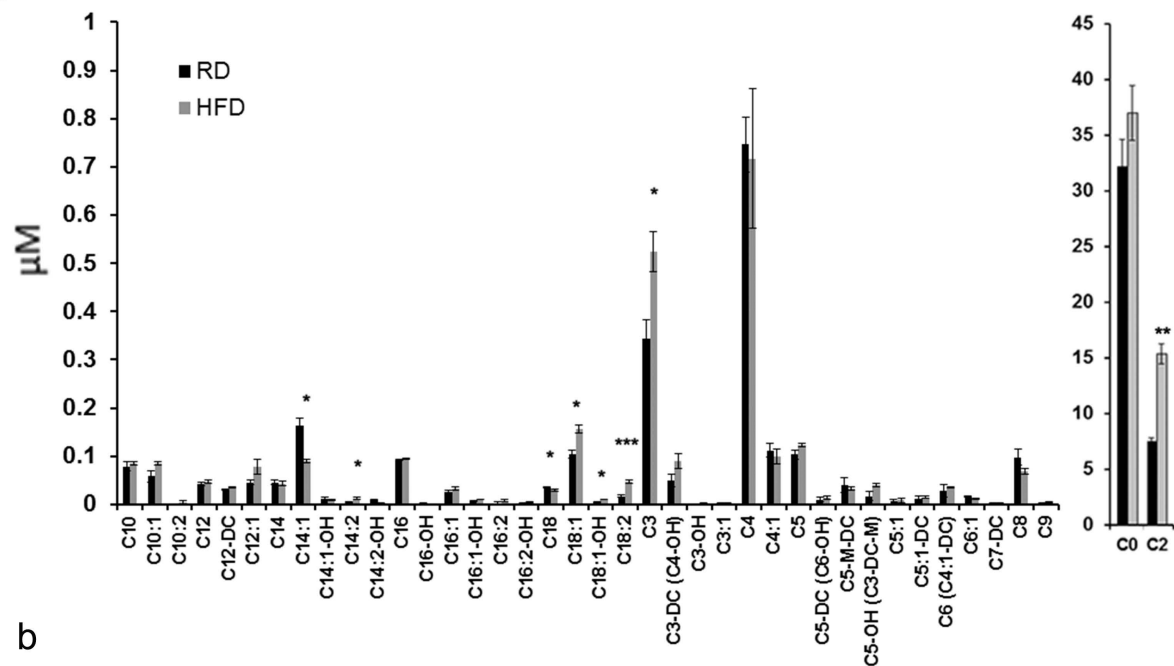

b

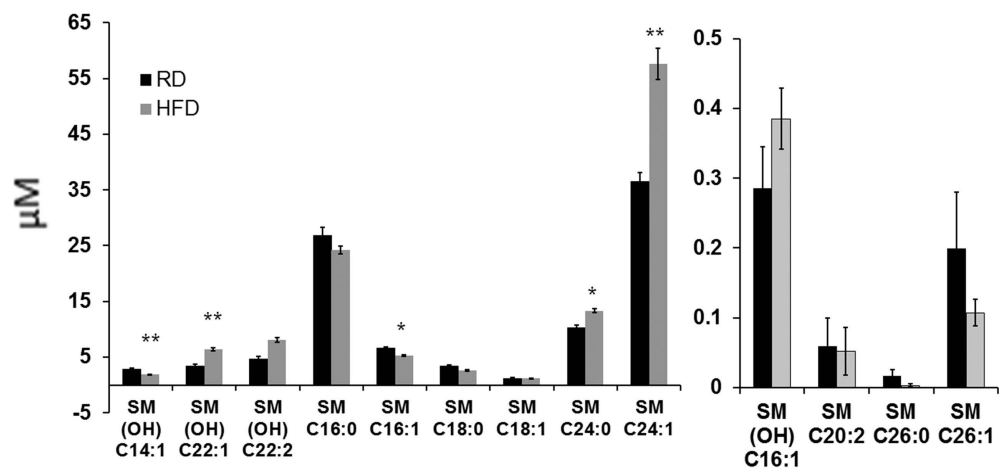

c

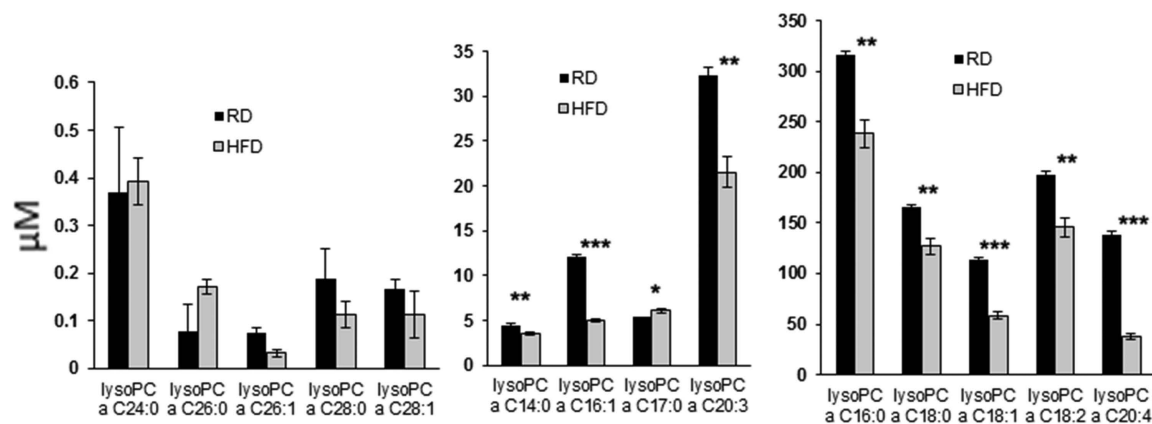

Supplement: f1 [file 4956016.f1.pdf]
